# Supplementary material for: Copper Binding and Redox Activity of α-Synuclein in Membrane-Like Environment
Source: MDPI journal article supplement (doi:10.3390/biom13020287), 2023-02-03
Supplement: s1 [file s1]

## ***Supporting Information***

# **Copper binding and redox activity of $\alpha$ -Synuclein in membrane like environment**

Chiara Bacchella<sup>1</sup>, Francesca Camponeschi<sup>2</sup>, Paulina Kolkowska<sup>2</sup>, Arian Kola<sup>2</sup>, Isabella Tessari<sup>3</sup>, Maria Camilla Baratto<sup>2</sup>, Marco Bisaglia<sup>3,4</sup>, Enrico Monzani<sup>1</sup>, Luigi Bubacco<sup>3,4</sup>, Stefano Mangani<sup>2</sup>, Luigi Casella<sup>1</sup>, Simone Dell'Acqua<sup>1,\*</sup> and Daniela Valensin<sup>2,5,\*</sup>

<sup>1</sup>Department of Chemistry, University of Pavia, Via Taramelli 12, 27100 Pavia, Italy

<sup>2</sup>Department of Biotechnology. Chemistry and Pharmacy, University of Siena, Via Aldo Moro 2, 53100 Siena, Italy

<sup>3</sup> Department of Biology, University of Padova, Padua 35121, Italy

<sup>4</sup>Study Center for Neurodegeneration (CESNE), Padua 35121, Italy.

<sup>5</sup>CIRMMP, Via Luigi Sacconi 6, 50019 Sesto Fiorentino (FI), Italy.

\*Correspondence: D.V. [daniela.valensin@unisi.it](mailto:daniela.valensin@unisi.it); Tel.+390577232428. S.D. [simone.dellacqua@unipv.it](mailto:simone.dellacqua@unipv.it); Tel.+390382987354

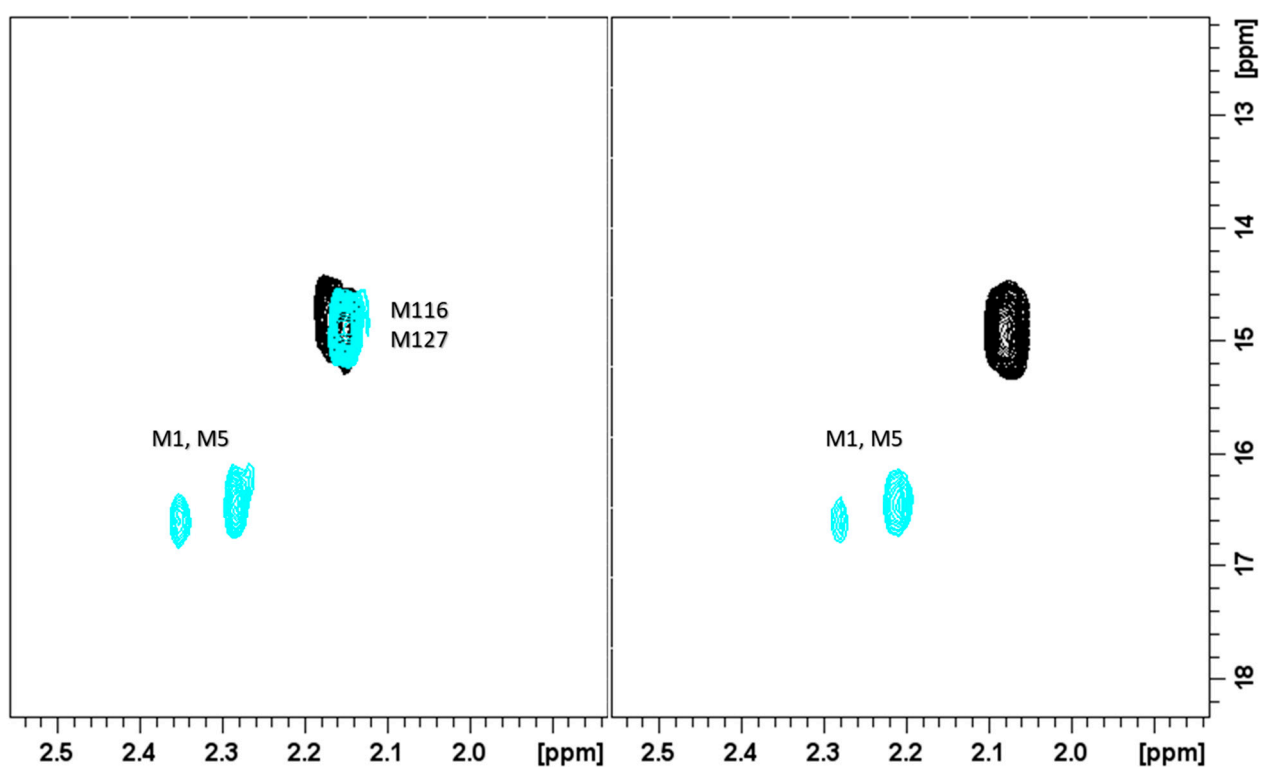

**Figure S1.** Overlaid  $^1\text{H}$ - $^{13}\text{C}$  HSQC spectra of micelles-bound  $\alpha\text{Syn}_{1-140}$  240  $\mu\text{M}$  (left panel) and  $\alpha\text{Syn}_{1-15}$  450  $\mu\text{M}$  (right panel) in absence and in presence of  $\text{Ag}^+$ : 0 eq (black), 0.8 eq (light blue). SDS- $\text{d}_{25}$  50mM, phosphate buffer 20 mM pH= 7.4, T =298 K.

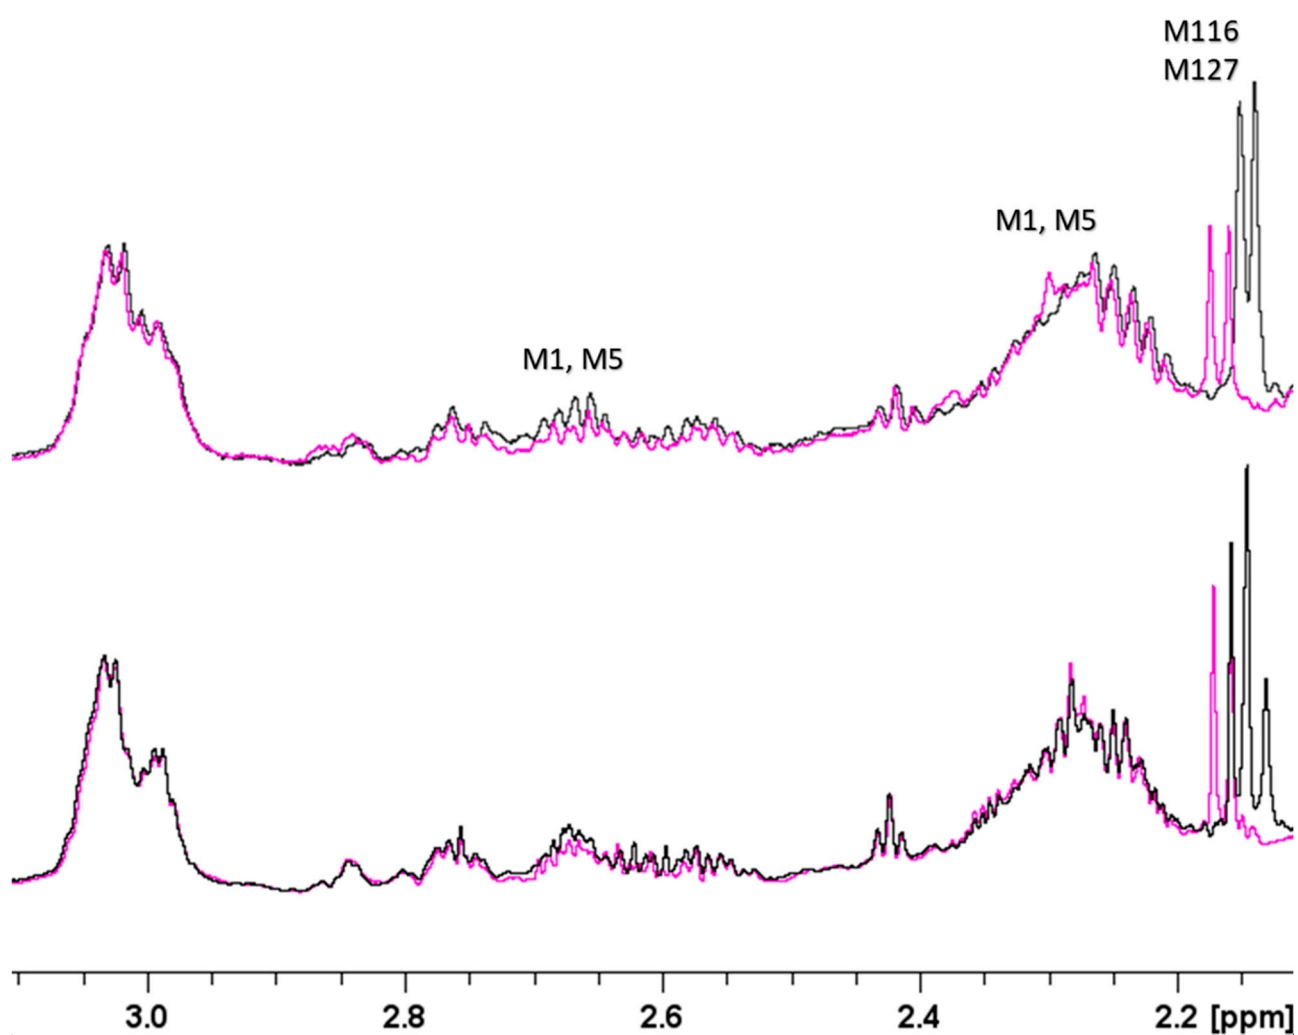

**Figure S2.** Overlaid <sup>1</sup>H 1D spectra of micelles-bound αSyn<sub>1-140</sub> (lower trace) and acetylated αSyn<sub>1-140</sub> in absence (black) and in presence of 0.8 Ag<sup>+</sup> eq (magenta). Protein concentrations 240 μM, SDS-d<sub>25</sub> 50mM, phosphate buffer 20 mM pH= 7.4, T =298 K.

**Table S1.** Fitting results of the EXAFS spectra including different models.

|                                                               | N° Fit | Atom type | N* | Distance (Å) | 2 $\sigma^2$ (Å <sup>2</sup> ) | R - factor | $\chi^2$ | $\Delta E_0$ (eV) |
|---------------------------------------------------------------|--------|-----------|----|--------------|--------------------------------|------------|----------|-------------------|
| <b><math>\alpha</math>S<sub>1-15</sub> SDS-Cu<sup>+</sup></b> | 1      | S         | 2  | 2.16 (1)     | 0.002 (1)                      | 0.023      | 12       | -5 (3)            |
|                                                               |        | S         | 2  | 2.68 (1)     | 0.005 (1)                      |            |          |                   |
|                                                               | 2      | S         | 4  | 2.22 (1)     | 0.008 (1)                      | 0.066      | 54       | 3 (4)             |
|                                                               | 3      | N/O       | 1  | 2.05 (1)     | 0.003 (1)                      | 0.039      | 32       | 8 (4)             |
|                                                               |        | S         | 3  | 2.24 (1)     | 0.006 (1)                      |            |          |                   |
|                                                               | 4      | S         | 3  | 2.23 (1)     | 0.004 (1)                      | 0.033      | 27       | 5 (3)             |
|                                                               | 5      | N/O       | 1  | 2.05 (1)     | 0.001 (1)                      | 0.034      | 28       | 10 (4)            |
|                                                               |        | S         | 2  | 2.25 (1)     | 0.002 (1)                      |            |          |                   |
| <b><math>\alpha</math>Syn SDS-Cu<sup>+</sup></b>              | 1      | S         | 2  | 2.11 (1)     | 0.007 (1)                      | 0.041      | 11       | -3(3)             |
|                                                               |        | S         | 1  | 2.99 (1)     | 0.013 (1)                      |            |          |                   |
|                                                               | 2      | N/O       | 1  | 1.94 (1)     | 0.002 (1)                      | 0.045      | 12       | 5 (3)             |
|                                                               |        | S         | 1  | 2.15 (1)     | 0.005 (1)                      |            |          |                   |
|                                                               |        | S         | 1  | 3.04 (1)     | 0.007 (1)                      |            |          |                   |
|                                                               | 3      | S         | 3  | 2.10 (1)     | 0.012 (2)                      | 0.078      | 20       | -6 (4)            |
|                                                               | 4      | S         | 1  | 2.12 (2)     | 0.001 (2)                      | 0.107      | 27.5     | 0 (5)             |
|                                                               |        | S         | 1  | 2.99 (2)     | 0.002 (2)                      |            |          |                   |
|                                                               | 5      | S         | 2  | 2.11 (1)     | 0.007 (1)                      | 0.063      | 16       | -5 (4)            |
|                                                               | 6      | S         | 4  | 2.09 (2)     | 0.017 (2)                      | 0.125      | 32       | -9 (5)            |
| <b><math>\alpha</math>Syn UV-Cu<sup>+</sup></b>               | 1      | S         | 3  | 2.27 (1)     | 0.008 (1)                      | 0.026      | 36       | 6 (3)             |
|                                                               | 2      | N/O       | 1  | 2.06 (1)     | 0.005 (1)                      | 0.060      | 62       | 5                 |
|                                                               |        | S         | 3  | 2.25 (1)     | 0.009 (1)                      |            |          |                   |
|                                                               | 3      | N/O       | 1  | 2.06 (1)     | 0.003 (1)                      | 0.097      | 100      | 5                 |
|                                                               |        | S         | 2  | 2.25 (1)     | 0.005 (1)                      |            |          |                   |
|                                                               | 4      | S         | 2  | 2.21 (2)     | 0.005 (2)                      | 0.066      | 89       | -2 (6)            |
|                                                               |        | S         | 2  | 2.74 (2)     | 0.010 (2)                      |            |          |                   |

*N\** – coordination number.

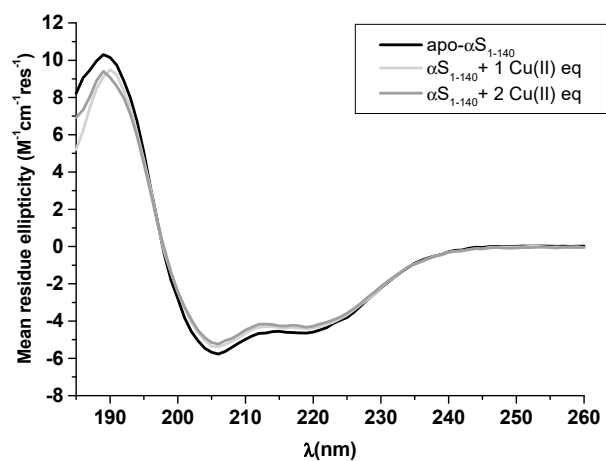

**Figure S3.** Far UV CD spectra at 298K of 10  $\mu$ M full length  $\alpha$ Syn at pH 7.4, in the presence of 50 mM SDS. Spectra were recorded at different  $\text{Cu}^{2+}$  concentration: 0 eq (black), 1 eq (light gray), 2 eq (dark grey).

**Table S2.** Anisotropic magnetic parameters of micelle bound  $\alpha\text{Syn}_{1-140}$ ,  $\alpha\text{Syn}_{1-15}$  and  $\alpha\text{Syn}_{45-15}$  copper(II) complexes.

|                            | $g_{\parallel}^a$ | $g_{\perp}^a$ | $A_{\parallel}(\text{mT})^b$ | $A_{\perp}(\text{mT})^b$ | $n^{\circ}\text{N}^c$ | $A_{\text{N}}(\text{mT})^b$ |
|----------------------------|-------------------|---------------|------------------------------|--------------------------|-----------------------|-----------------------------|
| $\alpha\text{Syn}_{1-140}$ | 2.236             | 2.056         | 17.8                         | 0.5                      | 2                     | 1.4                         |
| $\alpha\text{Syn}_{1-15}$  | 2.247             | 2.058         | 18.0                         | 0.65                     | 2                     | 8                           |
| $\alpha\text{Syn}_{45-55}$ | 2.2               | 2.076         | 122                          | 7.5                      | -                     | -                           |

<sup>a</sup> Estimated error  $\pm 0.001$ . <sup>b</sup> Coupling constant are given in mT. Estimated error for  $A_{\text{Cu}} = \pm 0.1 \text{ mT}$  and for  $A_{\text{N}} = \pm 0.05 \text{ mT}$ . <sup>c</sup> Number of equatorial nitrogen donor atoms.

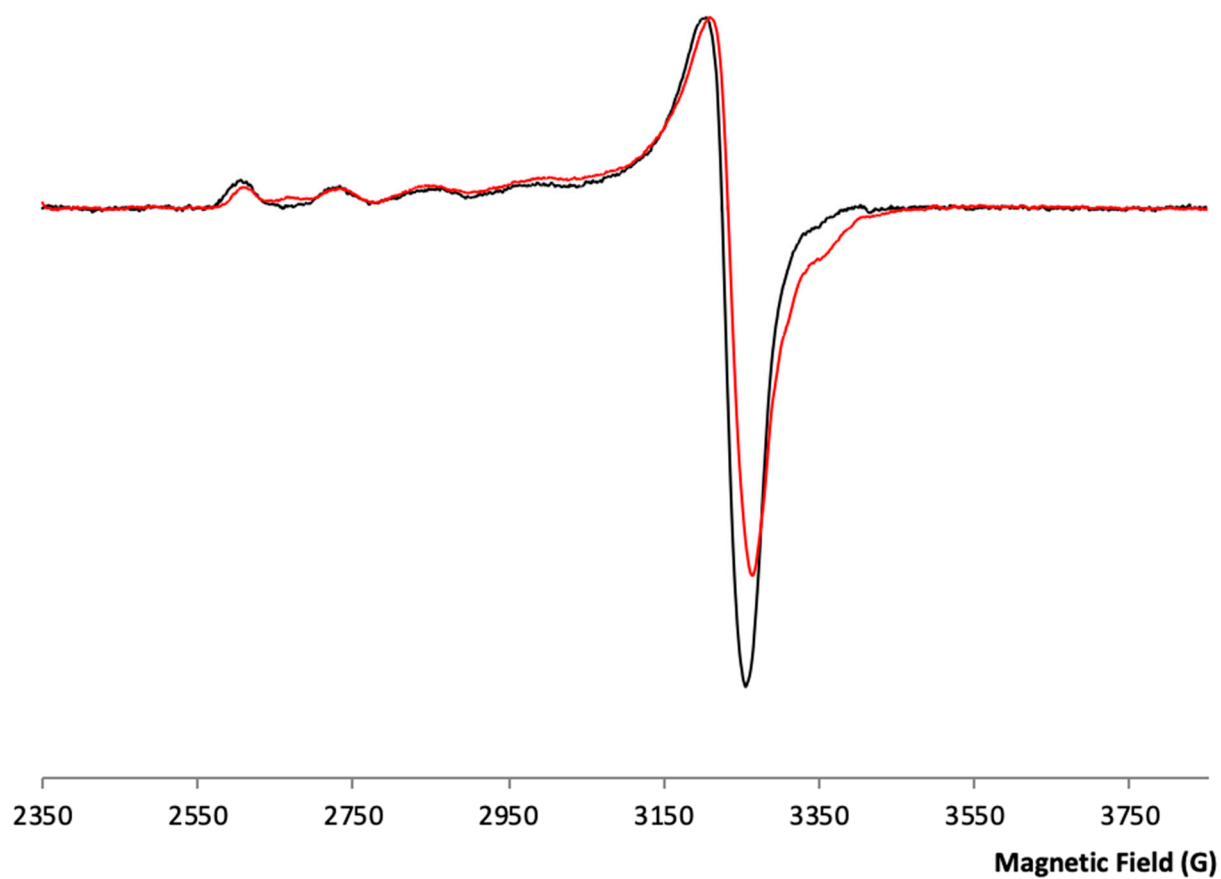

**Figure S4.** Comparison of EPR spectra of micelle bound  $\alpha$ Syn<sub>45-55</sub> Cu<sup>2+</sup> complex (red line) and hexaaquacopper(II) ion (black line).  $\alpha$ Syn<sub>45-55</sub> 500  $\mu$ M, Cu<sup>2+</sup>  $\mu$ M, SDS 50mM, phosphate buffer 20 mM pH= 7.4.

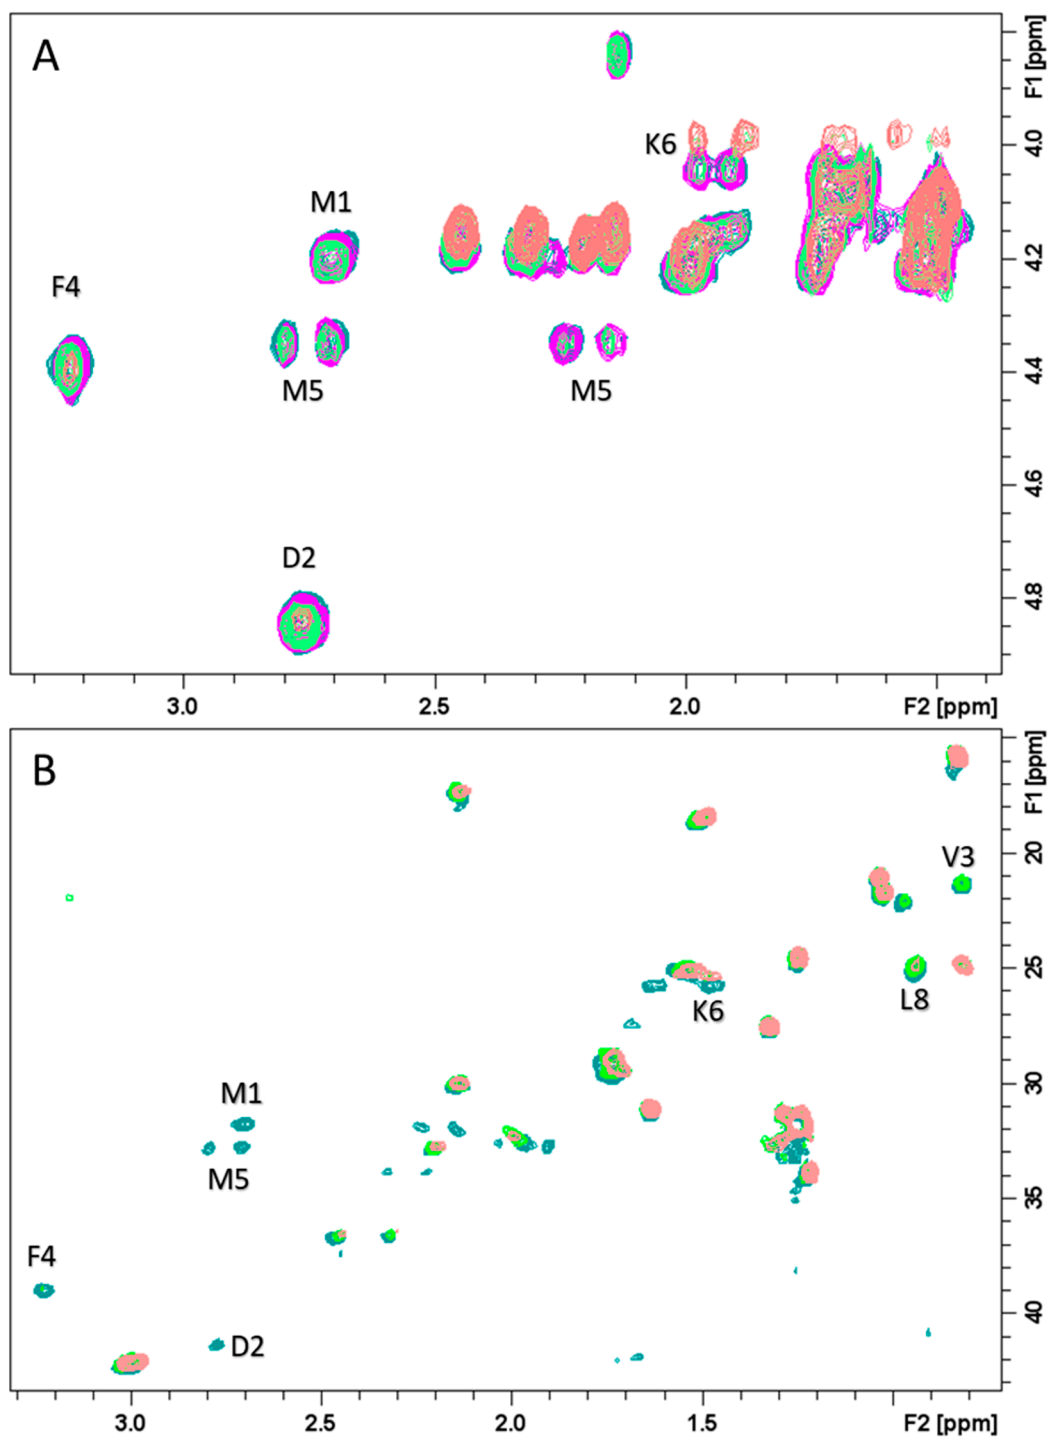

**Figure S5.** Overlaid  $^1\text{H}$ - $^1\text{H}$  TOCSY (A) and  $^1\text{H}$ - $^{13}\text{C}$  HSQC (B) spectra of  $\alpha\text{Syn}_{1-15}$  before (sea-green) and after the addition of increasing  $\text{Cu}^{2+}$  equivalent: 0.2  $\text{Cu}^{2+}$  equiv. (magenta), 0.4  $\text{Cu}^{2+}$  equiv. (green), 0.6  $\text{Cu}^{2+}$  equiv. (pink).  $\alpha\text{Syn}_{1-15}$  450  $\mu\text{M}$ , SDS- $d_{25}$  50mM, phosphate buffer 20 mM pH= 7.4, T =298 K.



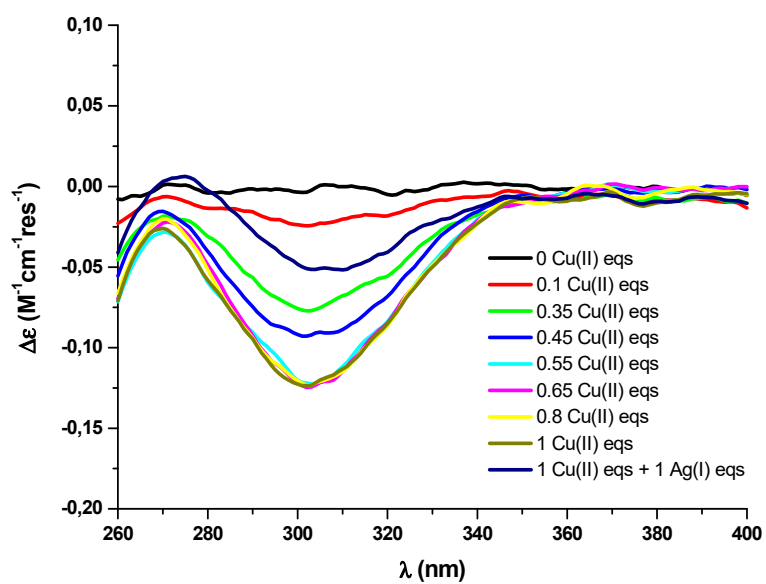

**Figure S6.** CD spectra of  $\text{Cu}^{2+}/\text{Ag}^{+}$   $\alpha\text{Syn}_{1-15}$  micelle bound system.  $\alpha\text{Syn}_{1-15}$  450  $\mu\text{M}$ , SDS 50mM, phosphate buffer 20 mM pH= 7.4, T =298 K.

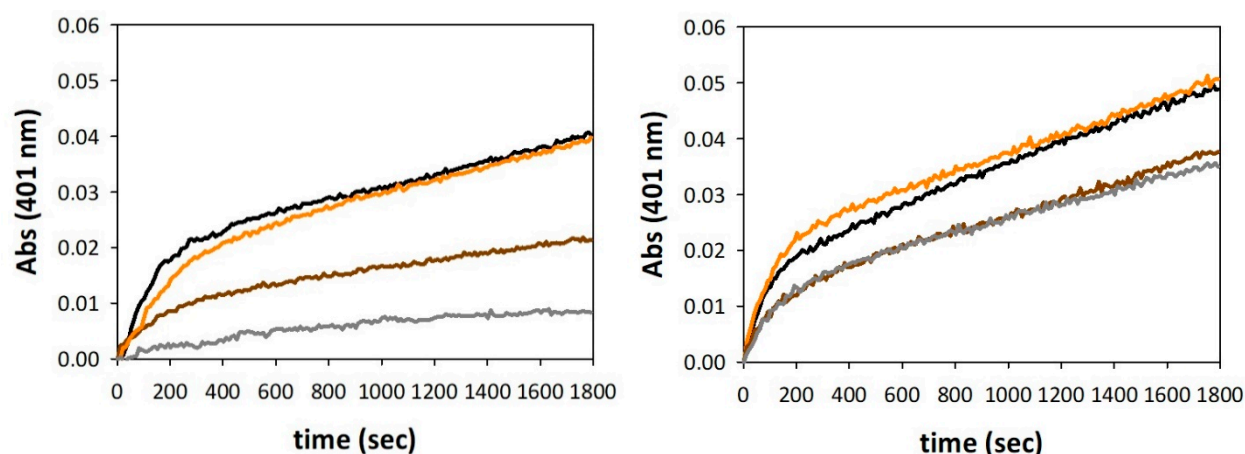

**Figure S7.** Kinetic profiles of 4-MC (3 mM) oxidation with time in 50 mM HEPES buffer at pH 7.4 and 20 °C in the presence of  $\text{Cu}^{2+}$  (25  $\mu\text{M}$ ) without SDS (black trace) and with SDS (20 mM) (orange), and with the addition of  $\alpha\text{Syn}$  (50  $\mu\text{M}$ , left panel and 25  $\mu\text{M}$ , right panel) without SDS (brown) and with SDS (20 mM) (grey).

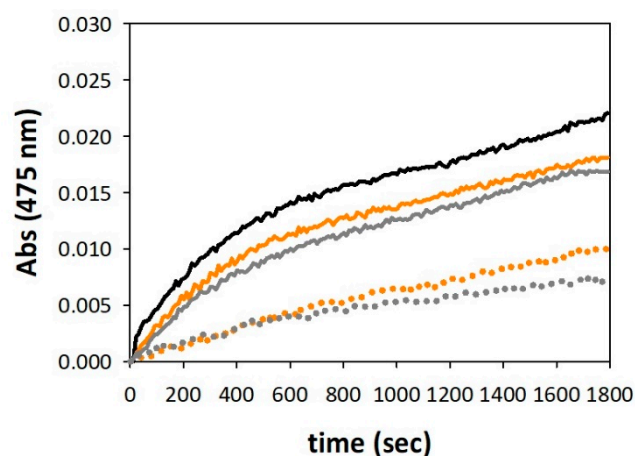

**Figure S8.** Kinetic profiles of dopamine (3 mM) oxidation with time in 50 mM HEPES buffer at pH 7.4 and 20 °C in the presence of  $\text{Cu}^{2+}$  (25  $\mu\text{M}$ ) (black trace) and upon the addition of 25 (orange) and 50  $\mu\text{M}$  (grey)  $\alpha\text{Syn}$  in buffered solution alone (solid traces) or in SDS micelles (dotted traces).

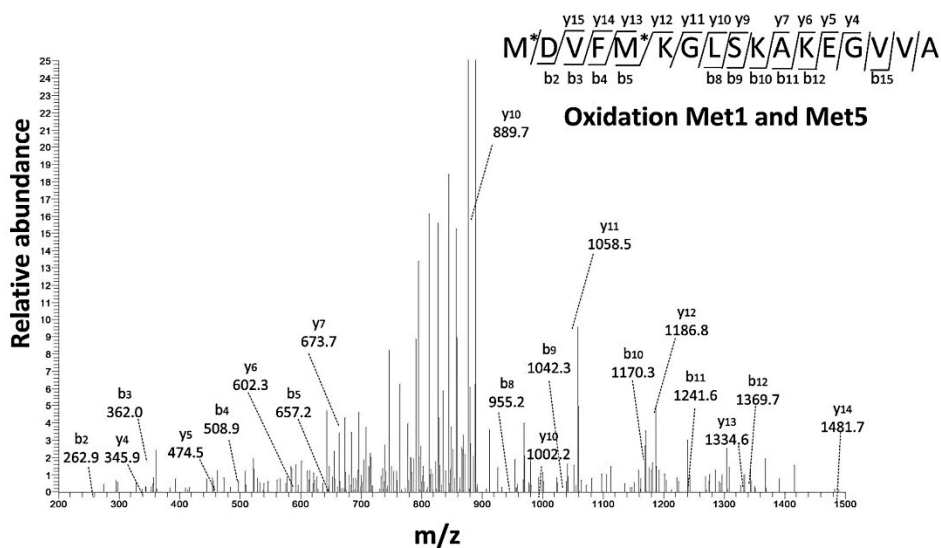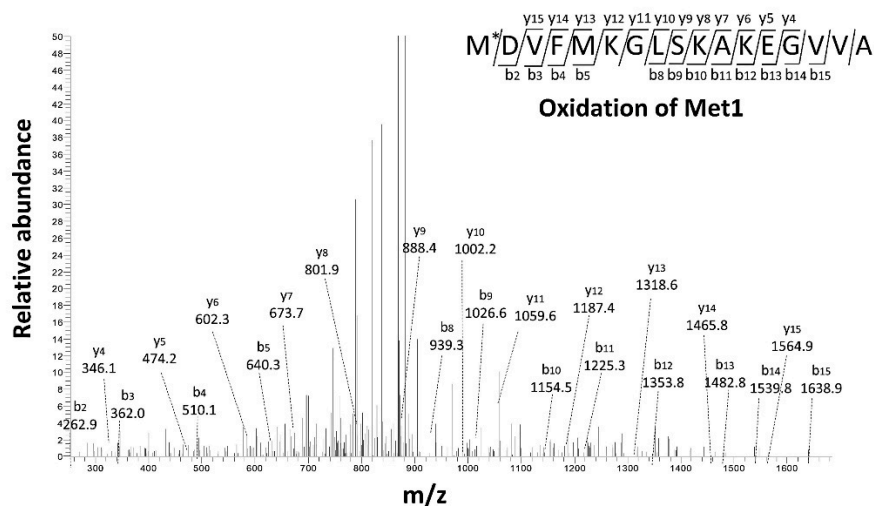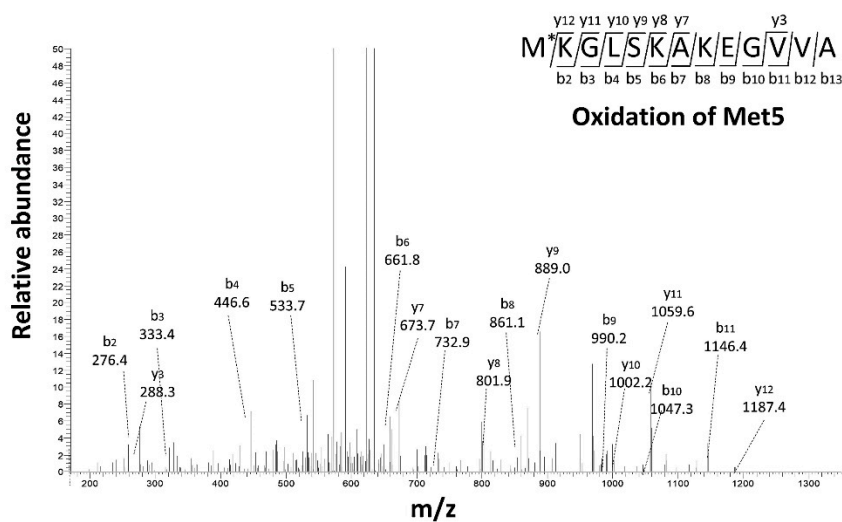

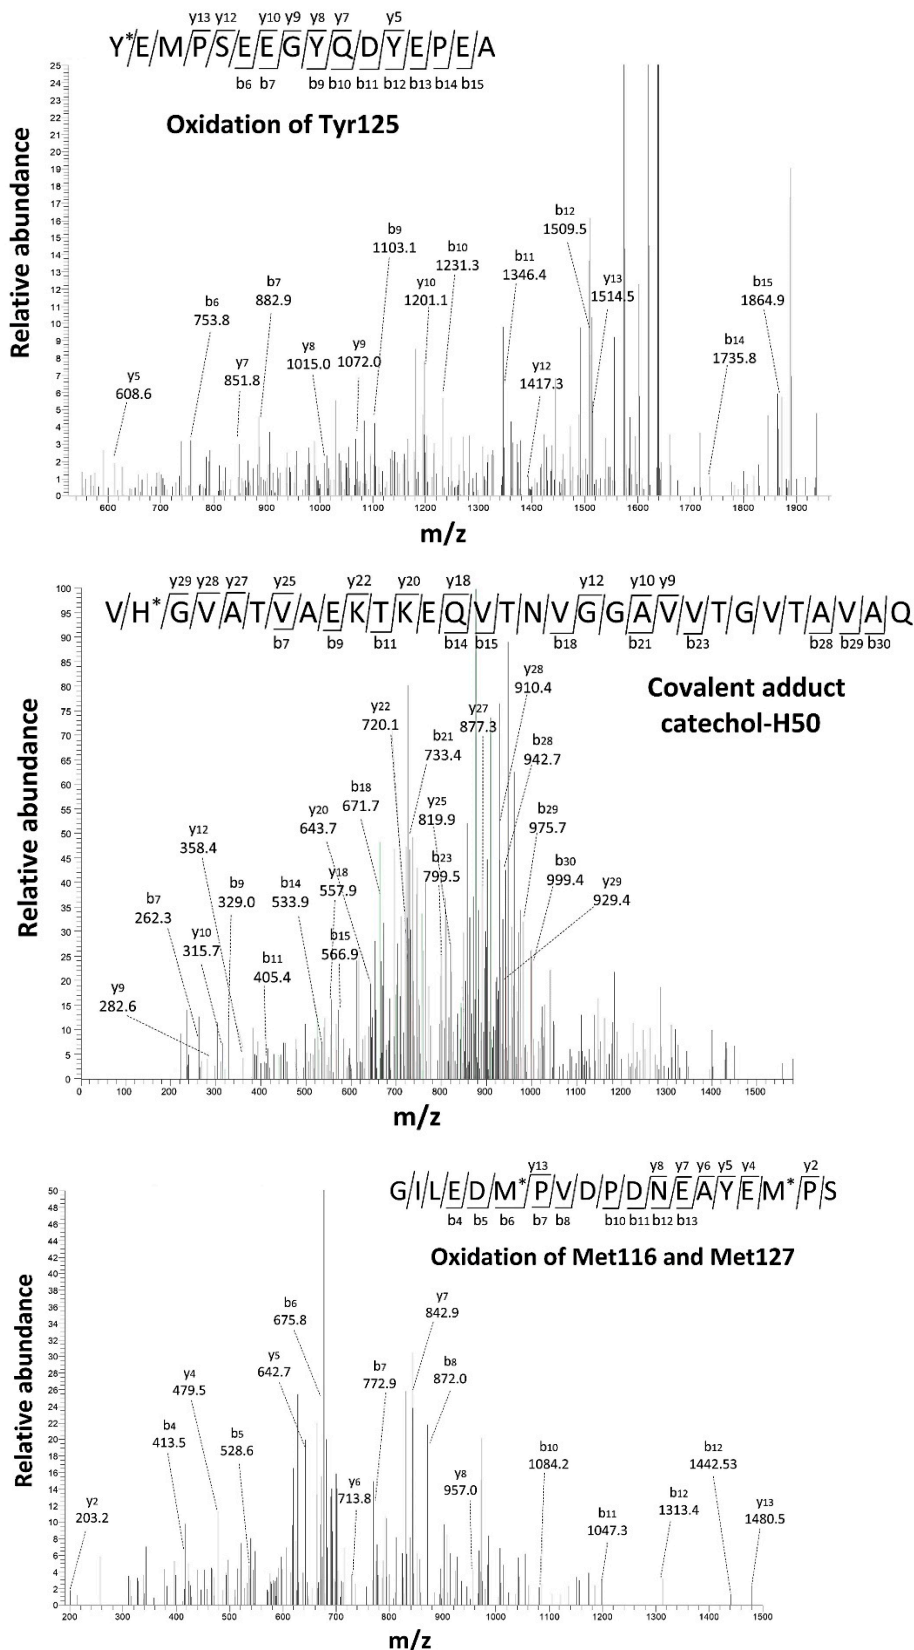

**Figure S9.** MS/MS spectra of more relevant fragments containing an insertion of one O-atom or of a catechol molecule obtained from HPLC-MS analysis of pepsin-digested  $\alpha$ Syn in the reaction mixture. The assignments of the y and b ion series is shown. At the top of each spectrum, the residues which have undergone the modification are shown as star-marked and the summary of the y and b ions found in the spectrum for each fragment is also presented.
